# Supplementary material
Source: publisher site journal article supplement (https://www.e-cmh.org/upload/media/cmh-2021-0137-suppl.pdf)
Supplement: Supplementary file 1 [file cmh-2021-0137-suppl.pdf]

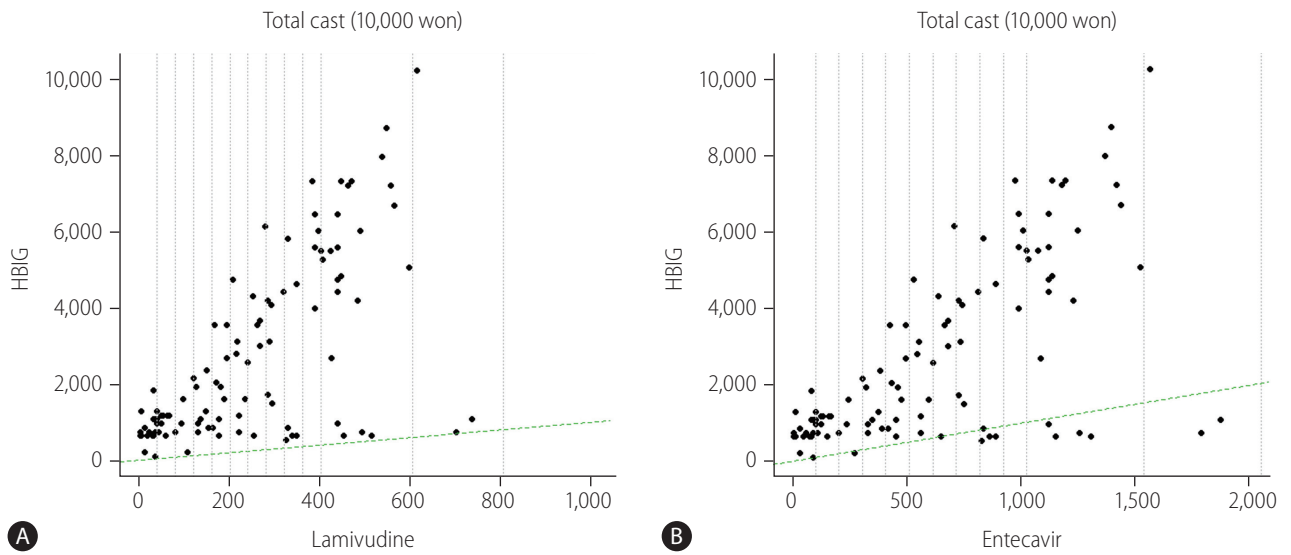

**Supplementary Figure 1.** Comparison of HBIG cost scatter plot and NAs cost over time. (A) Comparison of HBIG cost scatter plot and lamivudine cost over time. (B) Comparison of HBIG cost scatter plot and lamivudine cost over time. HBIG, hepatitis B immunoglobulin; NAs, nucleos(t)ide analogues.
